# Supplementary material for: Methamphetamine causes cardiovascular dysfunction via cystathionine gamma lyase and hydrogen sulfide depletion
Source: PubMed Central journal article supplement — Redox Biol. 2022 Sep 21;57:102480. doi: 10.1016/j.redox.2022.102480 (PMC9513700; doi:10.1016/j.redox.2022.102480), 2022-09-21
Supplement: mmc1.pdf [file mmc1.pdf]

## Sulfide levels in water

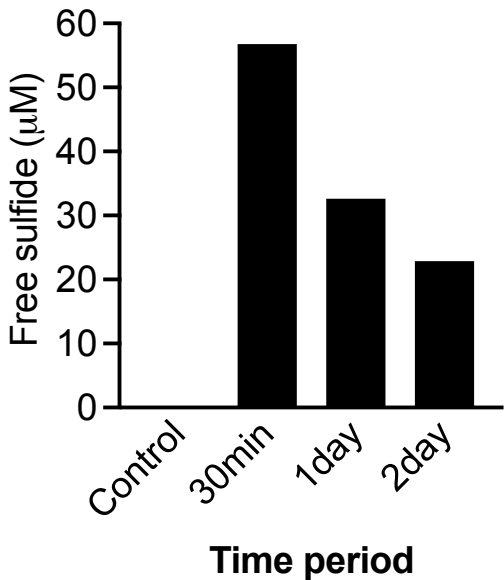

**Supplementary Figure 1**

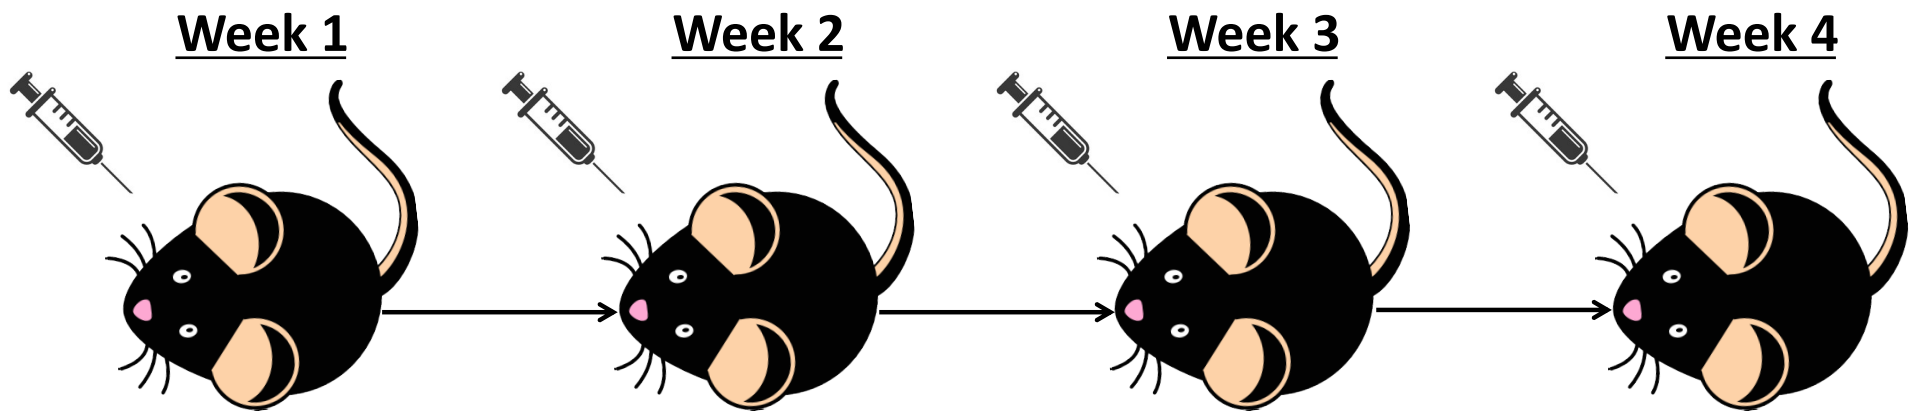

| Day | Injection time & Dosage (mg/kg) |    |    |    |
|-----|---------------------------------|----|----|----|
|     | 0h                              | 2h | 4h | 6h |
| 1   | 0                               | 0  | 0  | 0  |
| 2   | 1                               | 1  | 2  | 2  |
| 3   | 3                               | 3  | 4  | 4  |
| 4   | 5                               | 5  | 5  | 5  |
| 5   | 6                               | 6  | 6  | 6  |
| 6   | --                              | -- | -- | -- |
| 7   | --                              | -- | -- | -- |

| Day | Injection time & Dosage (mg/kg) |    |    |    |
|-----|---------------------------------|----|----|----|
|     | 0h                              | 2h | 4h | 6h |
| 1   | 0                               | 0  | 0  | 0  |
| 2   | 3                               | 3  | 4  | 4  |
| 3   | 5                               | 5  | 5  | 5  |
| 4   | 6                               | 6  | 6  | 6  |
| 5   | 6                               | 6  | 6  | 6  |
| 6   | --                              | -- | -- | -- |
| 7   | --                              | -- | -- | -- |

| Day | Injection time & Dosage (mg/kg) |    |    |    |
|-----|---------------------------------|----|----|----|
|     | 0h                              | 2h | 4h | 6h |
| 1   | 0                               | 0  | 0  | 0  |
| 2   | 3                               | 3  | 4  | 4  |
| 3   | 5                               | 5  | 5  | 5  |
| 4   | 6                               | 6  | 6  | 6  |
| 5   | 6                               | 6  | 6  | 6  |
| 6   | --                              | -- | -- | -- |
| 7   | --                              | -- | -- | -- |

| Day | Injection time & Dosage (mg/kg) |    |    |    |
|-----|---------------------------------|----|----|----|
|     | 0h                              | 2h | 4h | 6h |
| 1   | 0                               | 0  | 0  | 0  |
| 2   | 3                               | 3  | 4  | 4  |
| 3   | 5                               | 5  | 5  | 5  |
| 4   | 6                               | 6  | 6  | 6  |
| 5   | 6                               | 6  | 6  | 6  |
| 6   | --                              | -- | -- | -- |
| 7   | --                              | -- | -- | -- |

Supplementary Figure 2

**Supplementary Table 1.**

| <b>GENE</b> | <b>Forward primer</b>   | <b>Reverse primer</b>    |
|-------------|-------------------------|--------------------------|
| GAPDH       | CTCCCACTCTCCACCTTCG     | GCCTCTCTTGCTCAGTGTCC     |
| CSE         | TTCCTGCCTAGTTTCCAGCAT   | GGAAGTCCTGCTTAAATGTGGTG  |
| CBS         | GGCCTGATACCCCAAGCAG     | GGTGTTCCTCAATTTTCCTCAGAA |
| eNOS        | TGTGACCCTCACCGCTACAA    | GCACAATCCAGGCCCAATC      |
| ICAM-1      | GTGATGCTCAGGTATCCATCCA  | CACAGTTCTCAAAGCACAGCG    |
| VCAM-1      | TTGGAGGCTGAACACTTT      | ACCATCTTCACAGGCATT       |
| NOX4        | GGCAATGGAGAATAATACTG    | CCTCTGATGTAATGGAAC       |
| gp91phox    | TGAATGCCAGAGTCGGGATTT   | CGAGTCACGGCCACATACA      |
| p47phox     | GTGGTCTACAGAAAATTCACCGA | CCATGAGGCCGTTGAAGTATTC   |
| ATF4        | ATGACCGAAATGAGCTTCTG    | GCTGGAGAACCCATGAGGT      |
| SIRT1       | CGGCTACCGAGGTCCATATAC   | CAGCTCAGGTGGAGGAATTGT    |
| SIRT6       | CCAAATCGTCAGGTCAGGGA    | CAGAGTGGGGTACAGGGATG     |
